# Supplementary material for: Transformation of poly(l-lactide) crystals composed of linear chains into crystals composed of cycles
Source: Royal Society of Chemistry journal article supplement (doi:10.1039/d3py01370g), 2024-01-01
Supplement: d3py01370g1.pdf [file d3py01370g1.pdf]

## Supplemental Information

### Transformation of Poly(L-lactide) Crystals composed of linear Chains into Crystals composed of Cycles

Steffen M. Weidner, Andreas Meyer, Hans R. Kricheldorf\*

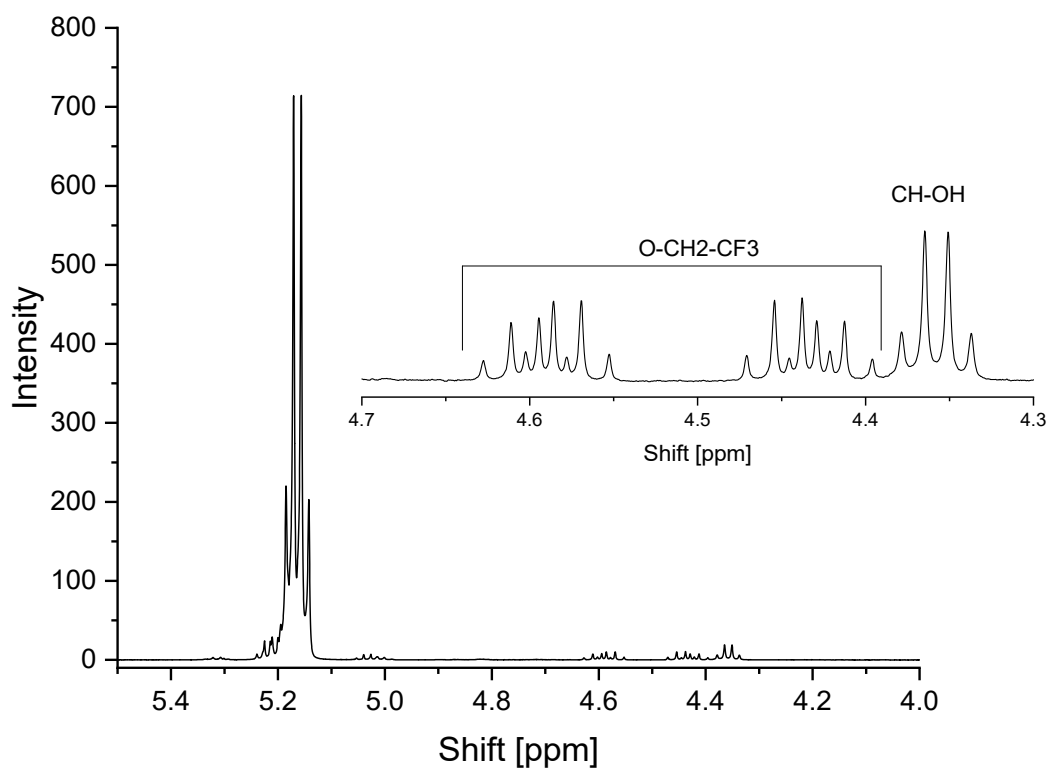

**Figure S1** <sup>1</sup>H NMR spectrum (segment) of the starting material PLATFE-25

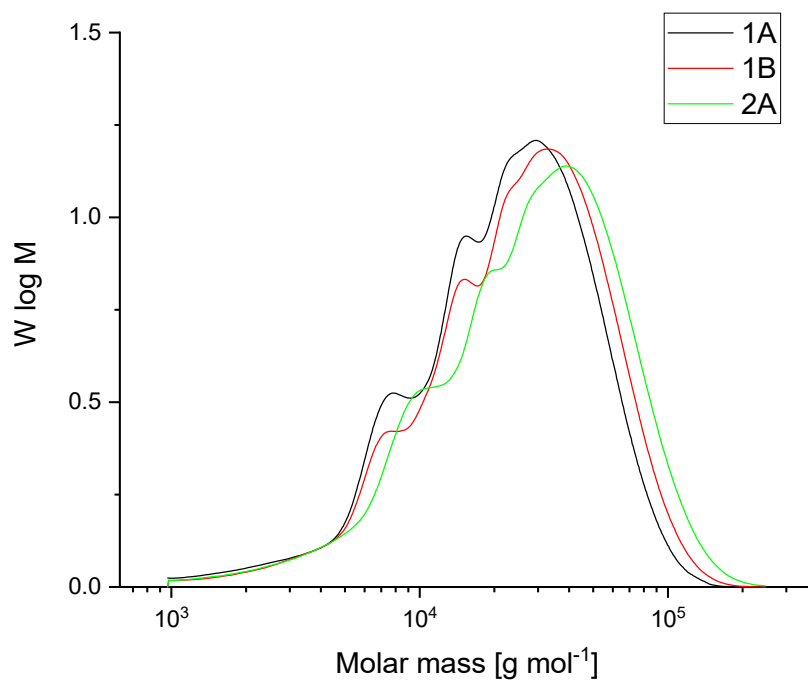

**Figure S2** GPC mass distribution curves of PLAs 1A, 1B, and 2A (Table 1) annealed with SnOct<sub>2</sub> at a LA/Cat ratio of 1 000/1

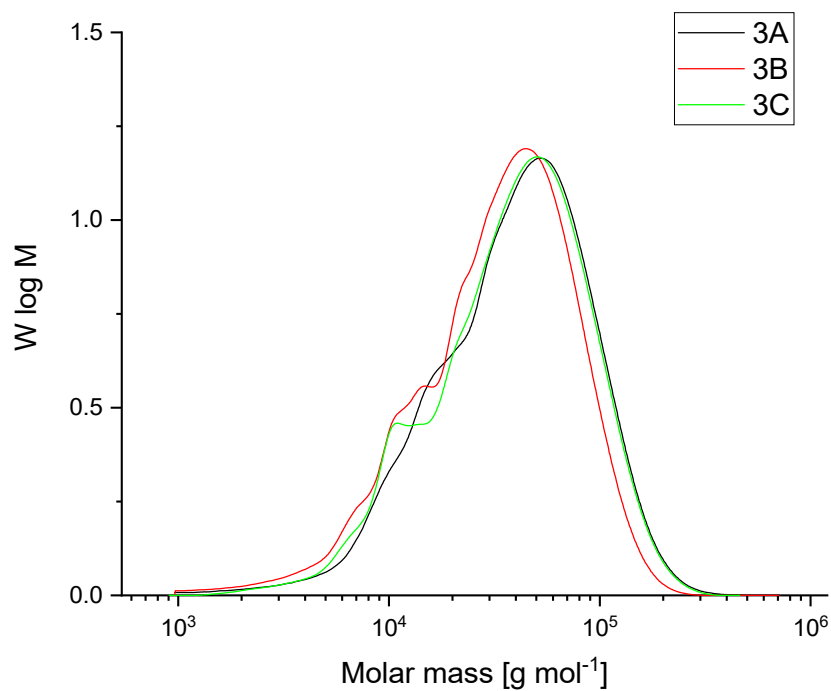

**Figure S3** GPC mass distribution curves of PLAs 3A, 3B, and 3A (Table 1) annealed with SnOct<sub>2</sub> at a LA/Cat ratio of 500/1

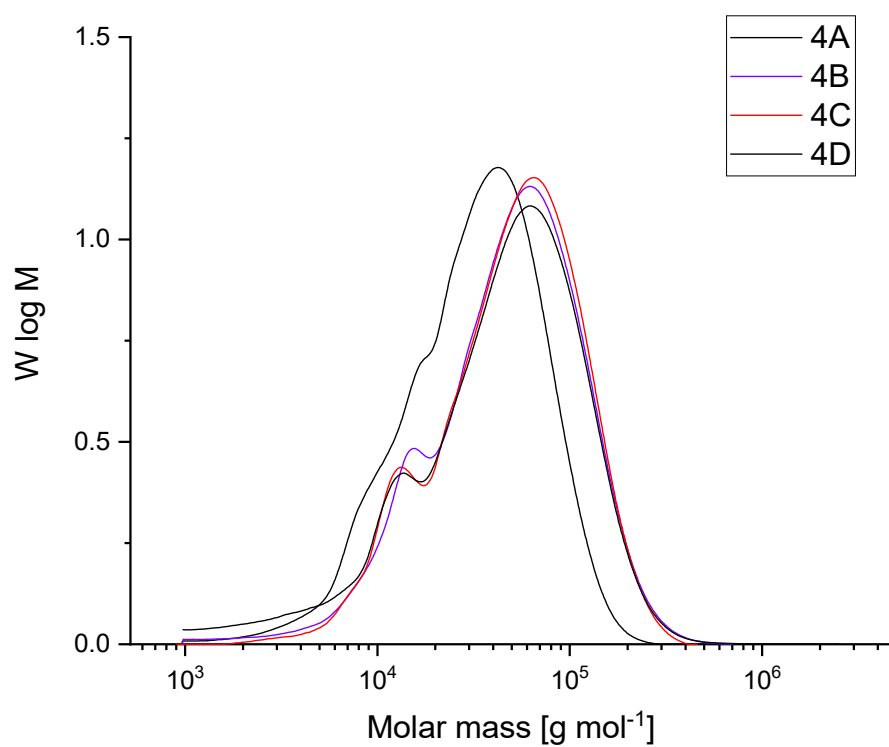

**Figure S4** GPC mass distribution curves of PLAs 4A-D (Table 1) annealed with SnOct<sub>2</sub> at a LA/Cat ratio of 250/1

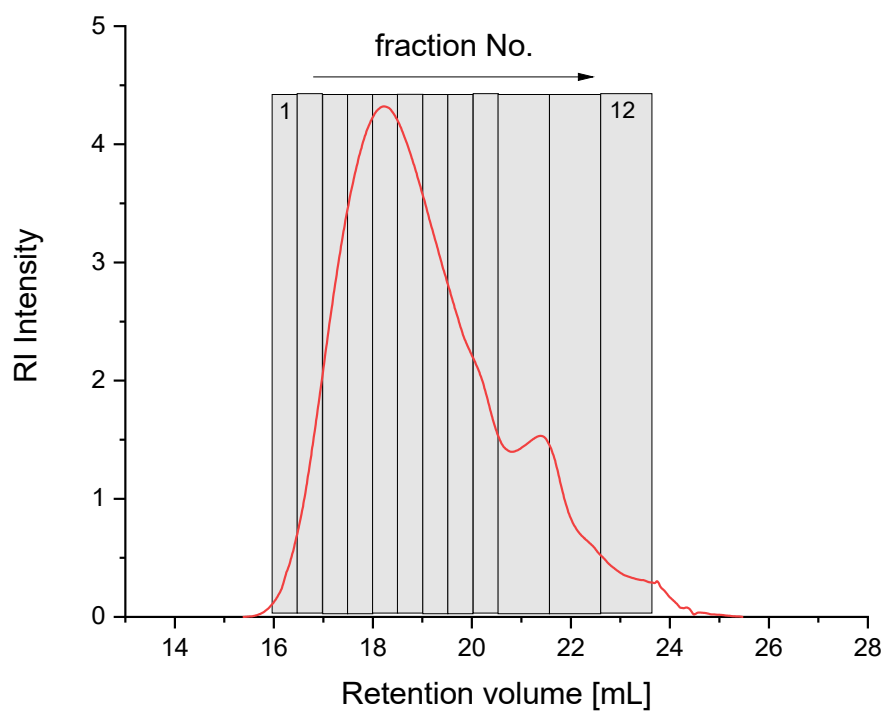

**Figure S5** GPC elution curve of the PLA prepared with SnOct<sub>2</sub> at 160 °C/28 days with indication of the fractionation.

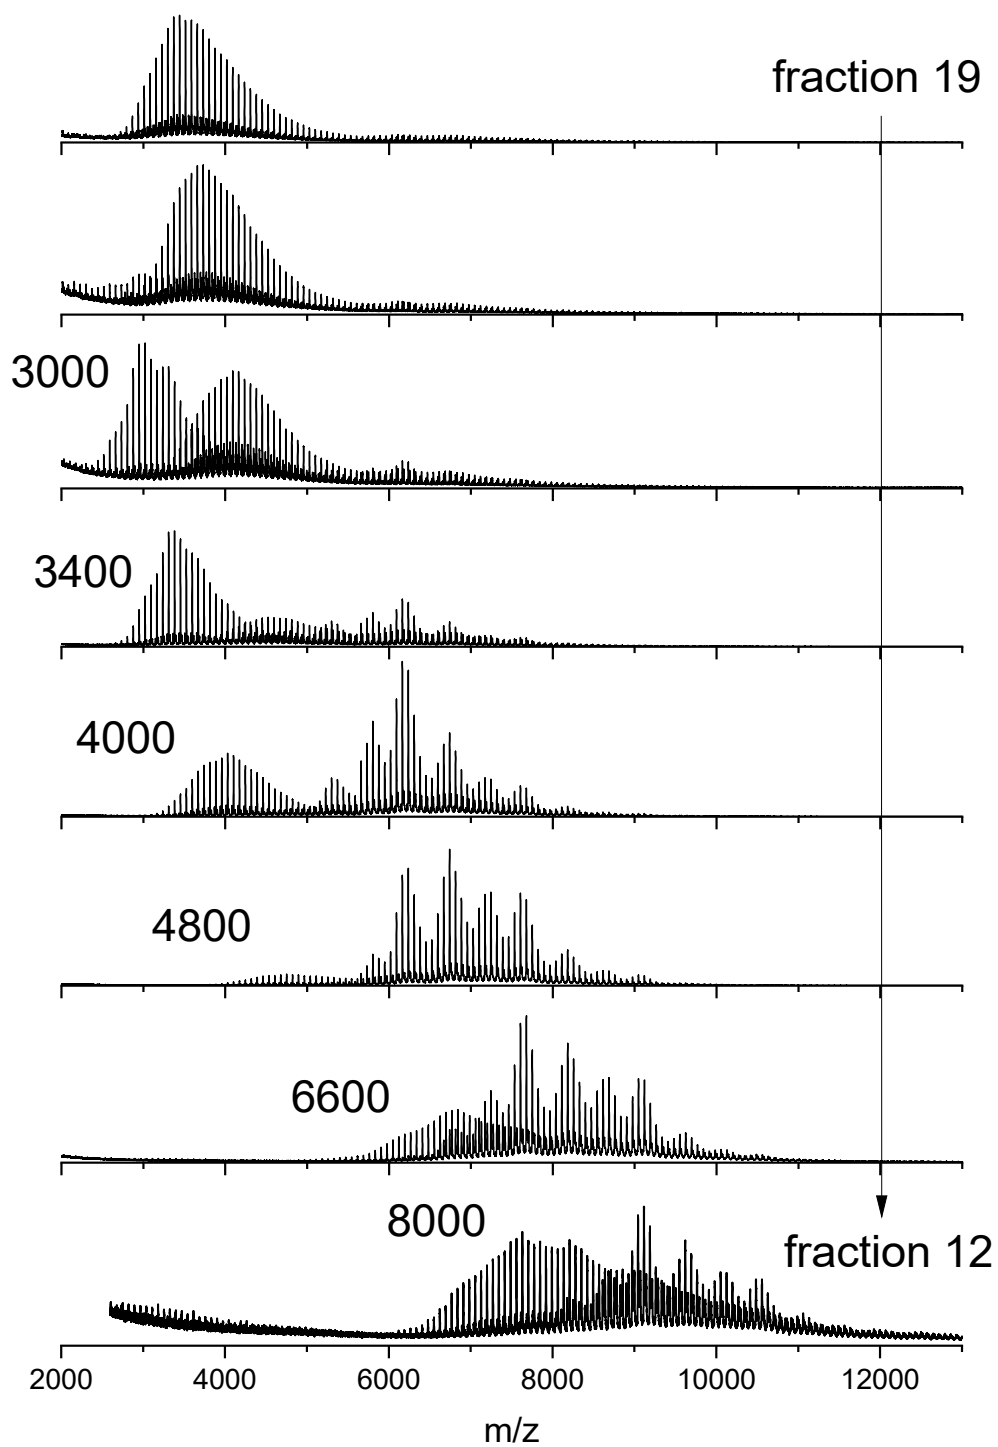

**Figure S6** MALDI TOF mass spectra of fractionated PLA-TFE annealed with SnOct<sub>2</sub> at 160°C for 42 days (LA/Cat = 250/1), fractions 12-19 showing MALDI mass spectra with single peak resolution

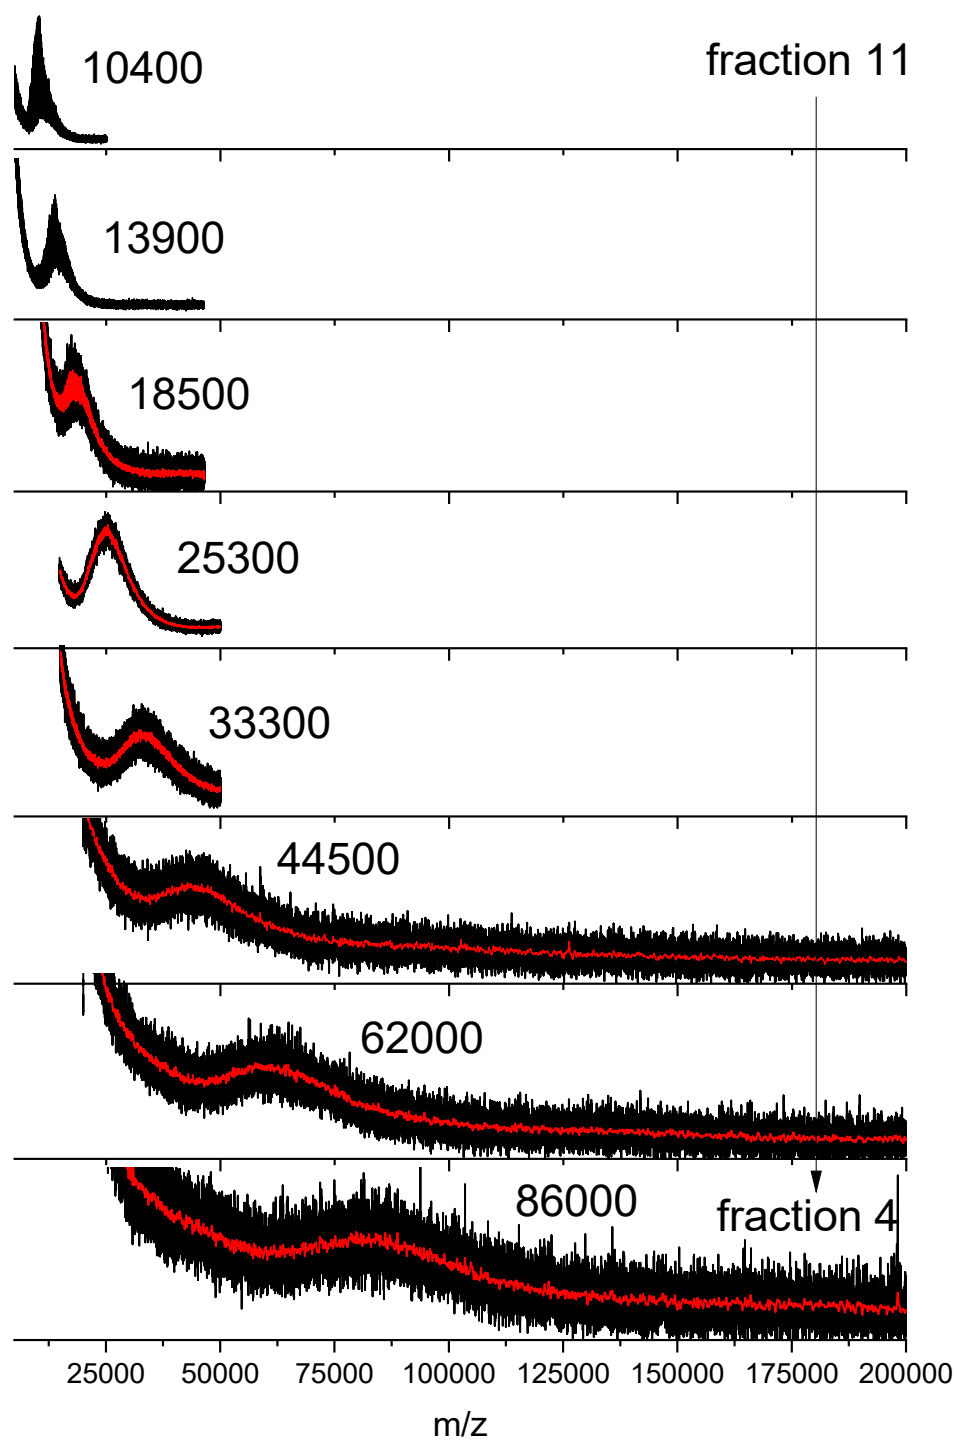

**Figure S7** MALDI TOF mass spectra of fractionated PLA-TFE annealed with SnOct<sub>2</sub> at 160°C for 42 d (LA/Cat = 250/1), fractions 11-4 with non-resolved mass spectra, red line indicates FFT smoothing (Origin2021, OriginLab, USA) for  $M_p$  determination

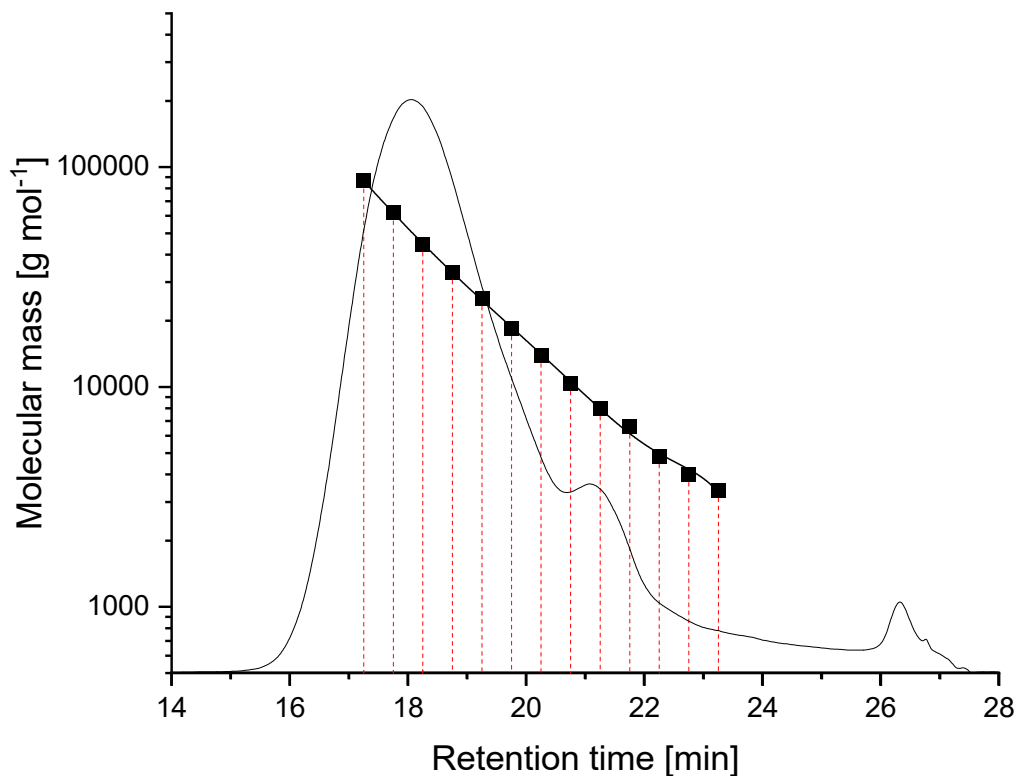

**Figure S8** GPC elution curve of the PLA prepared with SnOct<sub>2</sub> at 160°C/42d with indication of the fractionation (red dotted line) and calibration based on MALDI fractions shown in Figures S2 and S3 (polynomial fitting 5<sup>th</sup> order)

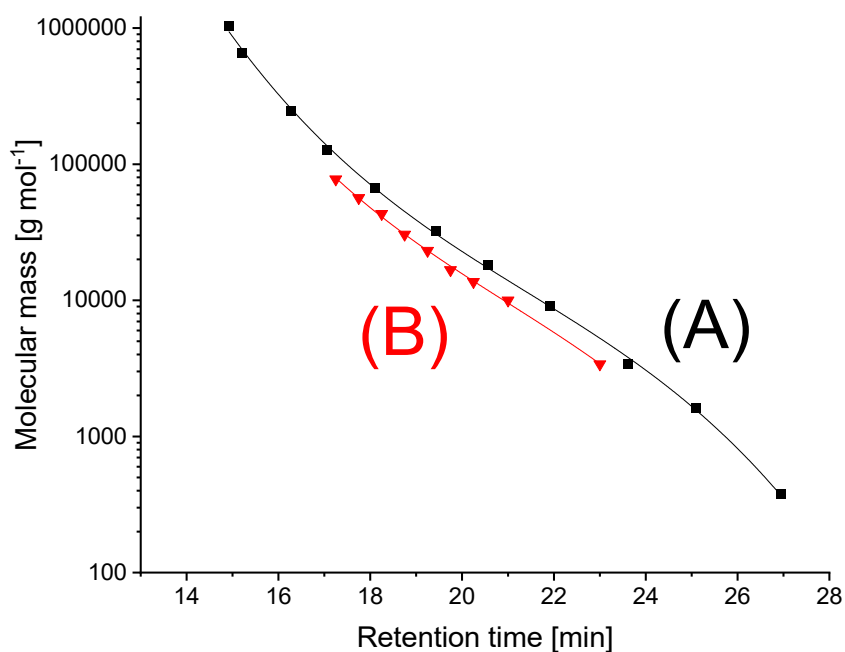

**Figure S9** GPC calibration curves: (A) based on polystyrene standards, (B) based on fractions of PLA 4C, Table 1.

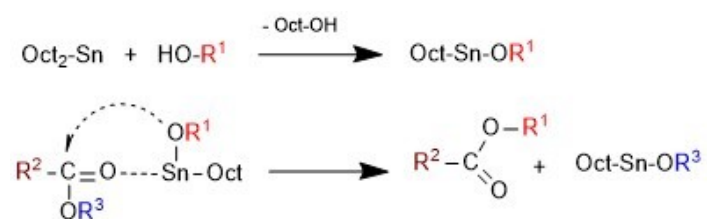

**Scheme S1** Mechanism of alcoholytic transesterification

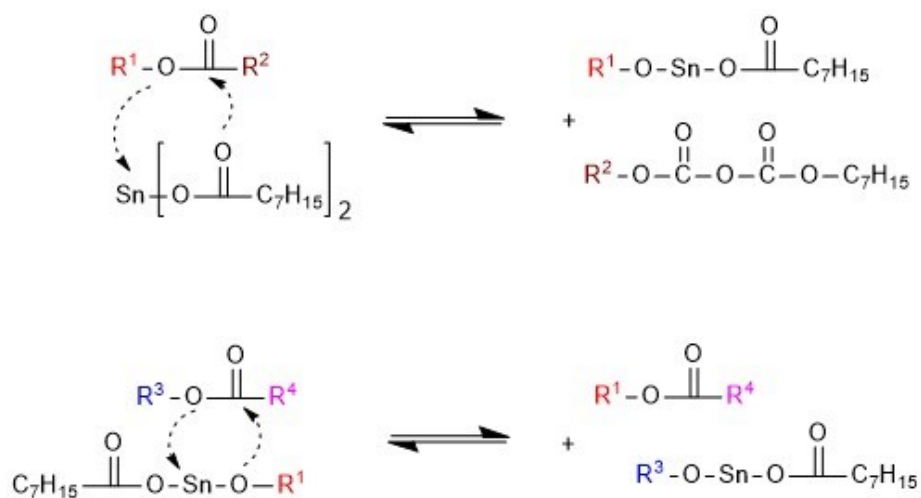

**Scheme S2** Mechanism of ester-ester-interchange reactions
